# Supplementary material for: Gene Expression and Metabolome Analysis Reveals Anti-Inflammatory Impacts of 11,17diHDoPE on PM10-Induced Mouse Lung Inflammation
Source: MDPI journal article supplement (doi:10.3390/ijms25105360), 2024-05-14
Supplement: s1 [file s1]

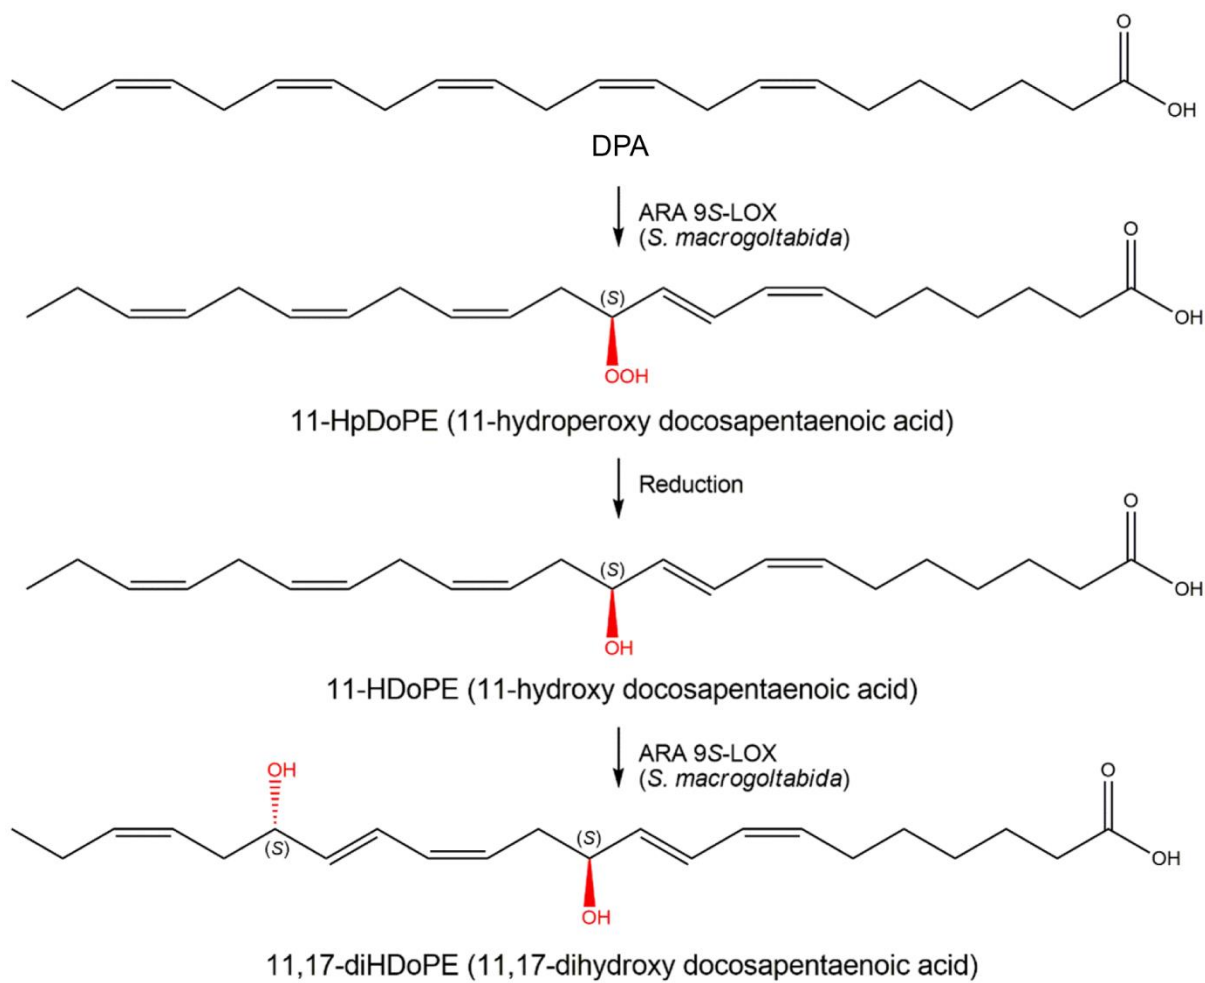

**Figure S1.** Biosynthetic pathway of DPA to 11,17diHDoPE by ARA 9S-LOX of *S. macrogoltabida*. ARA, arachidonate.

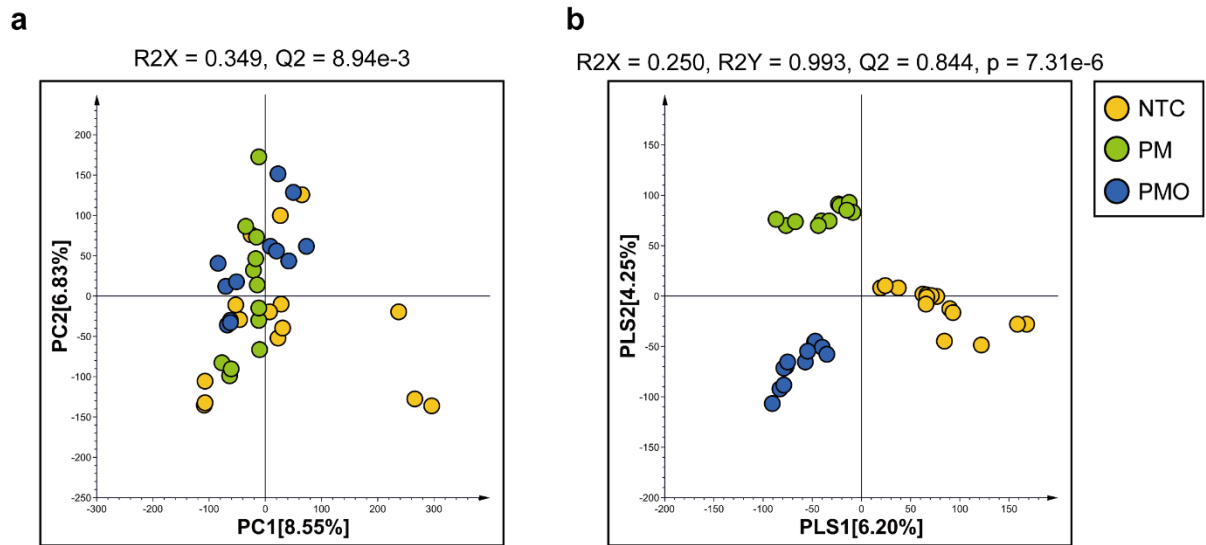

**Figure S2.** Multivariate analysis in lung tissue using GC-TOF-MS. (a) Principal component analysis and (b) PLS-DA score plots for mouse lung tissue (NTC,  $n = 5$ ; PM,  $n = 4$ ; PMO,  $n = 4$ ). All analyses were performed in three independent replicates. PLS-DA, partial least squares discriminant analysis; PM, particulate matter; NTC, non-treated control.

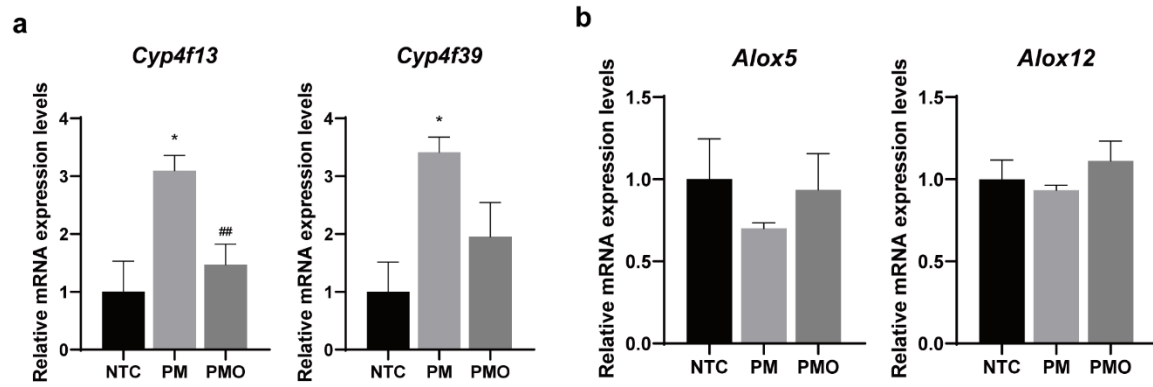

**Figure S3.** Effect of 11,17diHDoPE on the expression of genes associated with oxylipin-metabolic enzymes in mice exposed to PM10. **(a)** Relative mRNA levels of genes associated with the cytochrome p450 enzyme family in lung tissues from NTC, PM, and PMO mouse groups (NTC, n = 7; PM, n = 7; PMO, n = 7). mRNA levels of cytochrome p450 family genes were normalized to Gapdh mRNA levels. Results are shown as mean  $\pm$  standard error of the mean. An unpaired t-test (Mann-Whitney test) was used to assess the statistical significance of the differences between NTC and PM (\* $p$  < 0.05) and between PM and PMO (## $p$  < 0.01). **(b)** Relative mRNA levels of genes associated with LOX enzyme family in lung tissues from NTC, PM, and PMO mice groups.

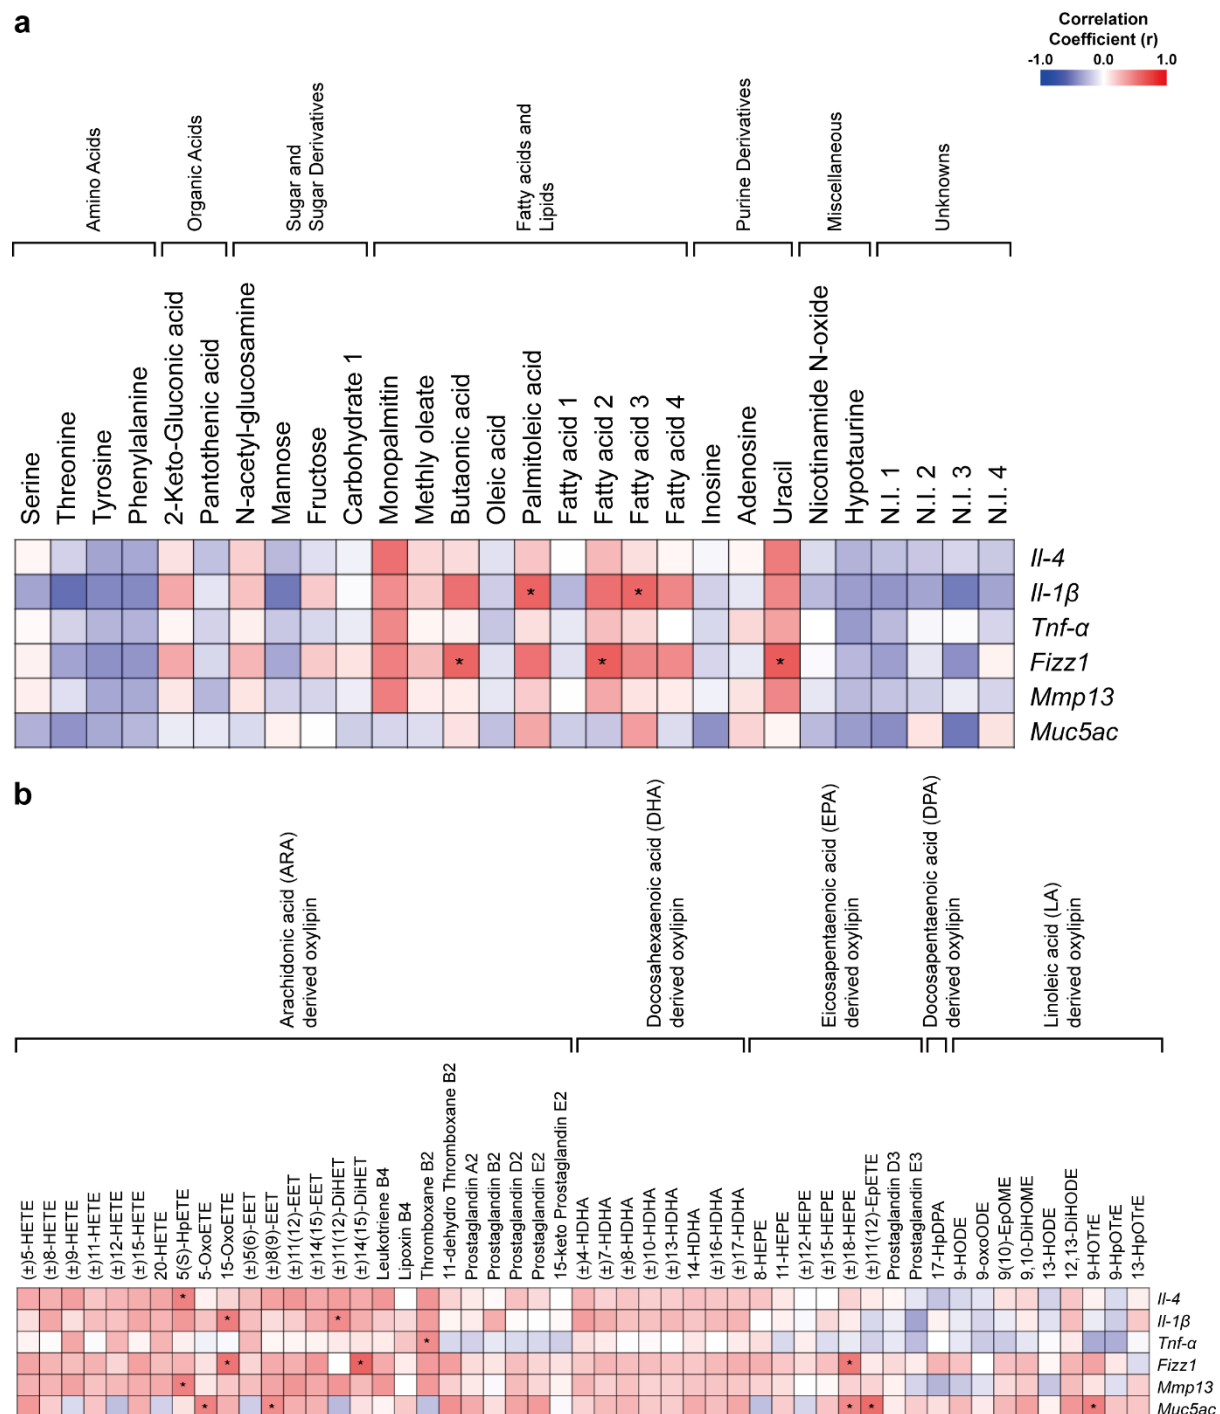

**Figure S4.** Correlation analysis between total metabolite levels and inflammation-related gene expression levels. (a) Correlation analysis between metabolite levels identified in lung tissues and inflammation-related gene expression levels in PM and PMO groups. (b) Correlation analysis between oxylipin levels identified in serum and inflammation-related gene expression levels in PM and PMO groups. Positive correlations are depicted in red, negative correlations in blue, and statistical significance is indicated by an asterisk ( $*p < 0.05$ ) where applicable.

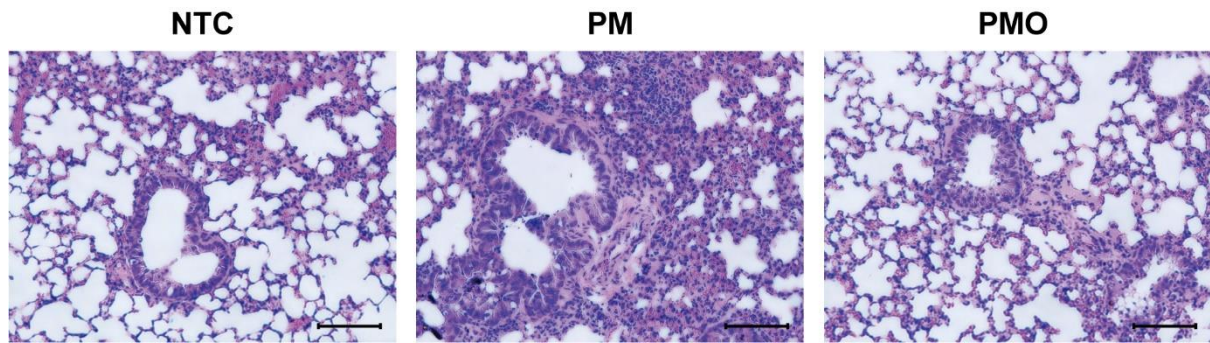

**Figure S5.** Histological assessment of immune cell infiltration at mouse lung tissues using hematoxylin and eosin (H&E) staining. Intense immune cell infiltration was induced by PM10 exposure in the PM group compared to NTC, whereas immune cell infiltration was markedly attenuated around alveoli in the PMO group. Images were taken at 100x magnification and captured with Nikon Image software. The scale bar represents 20  $\mu\text{m}$ .

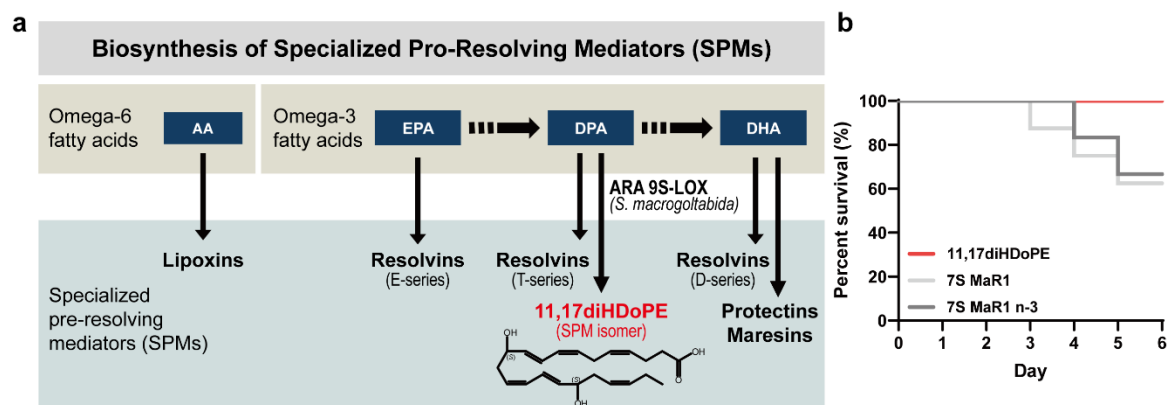

**Figure S6.** Biosynthesis of omega-6 and omega-3 fatty acid derived pro-resolving mediators (SPMs) with their effects in PM10-exposed mice. (a) A schematic of biosynthetic process of SPMs. 11,17diHDoPE was synthesized from DPA to 11,17diHDoPE by ARA 9S-LOX of *S. macrogoltabida*. AA, arachidonic acid; EPA, eicosapentaenoic acid; DPA, docosapentaenoic acid; DHA, docosahexaenoic acid. (b) Comparison of survival rates between mouse groups treated with three different oxylipins (11,17diHDoPE, n = 9; 7S MaR1, n = 10; 7S MaR1 n-3, n = 7). 11,17diHDoPE, 11,17diHDoPE-treated group; 7S MaR1, 7S MaR1-treated group; 7S MaR1 n-3, 7S MaR1 n-3--treated group.

**Table S1.** Lung tissue metabolites discriminating experimental groups based on metabolite profiling analyzed by GC-TOF-MS

| No.                                 | Tentative Identification  | GC-TOF-MS |          |              |                     |                                                   |     |         |                               |
|-------------------------------------|---------------------------|-----------|----------|--------------|---------------------|---------------------------------------------------|-----|---------|-------------------------------|
|                                     |                           | VIP<br>1  | VIP<br>2 | Ret<br>(min) | Unique<br>mass(m/z) | MS fragment<br>pattern(m/z)                       | TMS | ID      | One way<br>ANOVA<br>(p-value) |
| <i>Amino acids</i>                  |                           |           |          |              |                     |                                                   |     |         |                               |
| 1                                   | Serine                    | 0.80      | 1.27     | 8.01         | 218                 | 73, 204, 218, 75, 147, 205,<br>74, 116, 219, 206  | 3   | Lib/STD | 0.045                         |
| 2                                   | Threonine                 | 0.23      | 1.86     | 8.26         | 57                  | 73, 57, 117, 101, 219, 218,<br>147, 75, 100, 74   | 3   | Lib/STD | 0.005                         |
| 3                                   | Phenylalanine             | 1.19      | 2.33     | 10.26        | 218                 | 73, 218, 192, 100, 147, 75,<br>74, 91, 219, 59    | 2   | Lib/STD | 0.000                         |
| 4                                   | Tyrosine                  | 1.91      | 2.63     | 12.48        | 218                 | 73, 218, 100, 219, 147, 74,<br>75, 179, 220, 280  | 3   | Lib/STD | 0.000                         |
| <i>Organic acids</i>                |                           |           |          |              |                     |                                                   |     |         |                               |
| 5                                   | 2-Keto-Gluconic acid      | 1.92      | 1.99     | 10.49        | 204                 | 73, 147, 204, 103, 117,<br>201, 74, 205, 217, 75  | 5   | Lib/MS  | 0.025                         |
| 6                                   | Pantothenic acid          | 2.03      | 1.43     | 12.84        | 291                 | 73, 103, 75, 117, 157, 55,<br>201, 291, 159, 147  | 3   | Lib/MS  | 0.012                         |
| <i>Sugars and sugar derivatives</i> |                           |           |          |              |                     |                                                   |     |         |                               |
| 7                                   | Fructose                  | 3.26      | 2.47     | 12.10        | 307                 | 73, 103, 217, 147, 74, 133,<br>307, 117, 89, 104  | 5   | Lib/STD | 0.000                         |
| 8                                   | Carbohydrate <sub>1</sub> | 3.35      | 2.48     | 12.17        | 307                 | 73, 103, 217, 147, 74, 307,<br>89, 117, 75, 133   | 5   | Lib/MS  | 0.000                         |
| 9                                   | Mannose                   | 2.83      | 2.21     | 12.20        | 201                 | 73, 147, 160, 205, 103,<br>129, 319, 117, 157, 74 | 5   | Lib/STD | 0.002                         |
| 10                                  | N-acetyl-glucosamine      | 2.55      | 1.78     | 13.48        | 202                 | 73, 147, 129, 87, 103, 202,<br>205, 133, 117, 157 | 4   | Lib/STD | 0.011                         |
| <i>Fatty acids and lipids</i>       |                           |           |          |              |                     |                                                   |     |         |                               |
| 11                                  | Butanoic acid             | 2.30      | 1.80     | 6.09         | 233                 | 147, 73, 75, 117, 116, 148,<br>59, 101, 191, 66   | 2   | Lib/MS  | 0.007                         |
| 12                                  | Palmitoleic acid          | 1.65      | 1.45     | 12.94        | 311                 | 75, 73, 117, 129, 55, 67,<br>96, 81, 84, 69       | 1   | Lib/STD | 0.019                         |
| 13                                  | Methyl oleate             | 2.16      | 2.04     | 13.42        | 98                  | 55, 74, 69, 67, 87, 83, 84,<br>96, 81, 97         | 0   | Lib/STD | 0.001                         |
| 14                                  | Oleic acid                | 2.91      | 2.39     | 14.11        | 339                 | 117, 75, 129, 73, 55, 96,<br>145, 84, 98, 81      | 1   | Lib/STD | 0.035                         |
| 15                                  | Fatty acid 1              | 0.23      | 1.80     | 15.11        | 329                 | 59, 72, 55, 60, 69, 67, 57,<br>126, 112, 83       | 0   | Lib/MS  | 0.001                         |
| 16                                  | Fatty acid 2              | 2.77      | 2.59     | 15.22        | 367                 | 75, 73, 55, 67, 69, 74, 79,<br>81, 54, 61         | 2   | Lib/MS  | 0.004                         |
| 17                                  | Fatty acid 3              | 0.70      | 1.68     | 15.95        | 218                 | 73, 129, 147, 103, 75, 55,<br>218, 57, 131, 203   | 2   | Lib/MS  | 0.005                         |
| 18                                  | Fatty acid 4              | 0.20      | 1.34     | 15.96        | 270                 | 73, 75, 79, 67, 91, 55, 117,<br>80, 129, 93       | 1   | Lib/MS  | 0.004                         |
| 19                                  | Monopalmitin              | 0.39      | 1.46     | 16.13        | 371                 | 73, 147, 57, 129, 55, 75,<br>103, 203, 71, 83     | 2   | Lib/MS  | 0.042                         |
| <i>Purines and pyrimidine</i>       |                           |           |          |              |                     |                                                   |     |         |                               |
| 20                                  | Uracil                    | 2.09      | 1.52     | 7.83         | 99                  | 99, 73, 147, 241, 126, 113,<br>255, 256, 100, 131 | 2   | Lib/STD | 0.007                         |
| 21                                  | Inosine                   | 3.46      | 2.41     | 16.18        | 230                 | 73, 217, 230, 147, 245,<br>103, 193, 74, 75, 281  | 4   | Lib/STD | 0.000                         |
| 22                                  | Adenosine                 | 0.21      | 1.57     | 16.49        | 236                 | 73, 236, 230, 75, 217, 71,<br>103, 57, 245, 192   | 4   | Lib/STD | 0.030                         |
| <i>Others</i>                       |                           |           |          |              |                     |                                                   |     |         |                               |

|                 |                         |      |      |       |     |                                                 |   |         |       |
|-----------------|-------------------------|------|------|-------|-----|-------------------------------------------------|---|---------|-------|
| 23              | Nicotinamide<br>N-oxide | 0.31 | 1.08 | 9.09  | 179 | 75, 179, 136, 78, 51, 76,<br>105, 180, 77, 61   | 1 | Lib/MS  | 0.035 |
| 24              | Hypotaurine             | 1.98 | 2.21 | 10.06 | 188 | 73, 100, 188, 59, 147, 174,<br>86, 114, 75, 74  | 3 | Lib/STD | 0.000 |
| <i>Unknowns</i> |                         |      |      |       |     |                                                 |   |         |       |
| 25              | N.I. 1                  | 0.23 | 1.80 | 15.11 | 329 | 59, 72, 55, 60, 69, 67, 57,<br>126, 112, 83     | 0 | Lib/MS  | 0.001 |
| 26              | N.I. 2                  | 2.77 | 2.59 | 15.22 | 367 | 75, 73, 55, 67, 69, 74, 79,<br>81, 54, 61       | 2 | Lib/MS  | 0.004 |
| 27              | N.I. 3                  | 0.70 | 1.68 | 15.95 | 218 | 73, 129, 147, 103, 75, 55,<br>218, 57, 131, 203 | 2 | Lib/MS  | 0.005 |
| 28              | N.I. 4                  | 0.20 | 1.34 | 15.96 | 270 | 73, 75, 79, 67, 91, 55, 117,<br>80, 129, 93     | 1 | Lib/MS  | 0.004 |



**Table S2.** Serum oxylipins identified in experimental groups based on lipid profiling analyzed by LC-Triple-quadrupole-MS

| LC-Triple-quadrupole-MS                      |                           |                   |           |                    |        |                  |                         |                            |
|----------------------------------------------|---------------------------|-------------------|-----------|--------------------|--------|------------------|-------------------------|----------------------------|
| No.                                          | Compound name             | Molecular formula | Ret (min) | Precursor ion(m/z) | Adduct | Product ion(m/z) | One way ANOVA (p-value) | t-test p-value (PM vs PMO) |
| <i>Arachidonic acid derived oxylipins</i>    |                           |                   |           |                    |        |                  |                         |                            |
| 1                                            | (±)5-HETE                 | C20H32O3          | 11.63     | 319.00             | [M-H]– | 115.05           | 0.176                   | 0.201                      |
| 2                                            | (±)8-HETE                 | C20H32O3          | 11.40     | 319.00             | [M-H]– | 155.15           | 0.031                   | 0.062                      |
| 3                                            | (±)9-HETE                 | C20H32O3          | 11.45     | 319.00             | [M-H]– | 179.35           | 0.141                   | 0.332                      |
| 4                                            | (±)11-HETE                | C20H32O3          | 11.27     | 319.00             | [M-H]– | 167.20           | 0.060                   | 0.153                      |
| 5                                            | (±)12-HETE                | C20H32O3          | 11.44     | 319.00             | [M-H]– | 179.20           | 0.074                   | 0.156                      |
| 6                                            | (±)15-HETE                | C20H32O3          | 11.11     | 319.00             | [M-H]– | 219.20           | 0.049                   | 0.072                      |
| 7                                            | 20-HETE                   | C20H32O3          | 11.44     | 319.00             | [M-H]– | 301.30           | 0.049                   | 0.108                      |
| 8                                            | 5(S)-HpETE                | C20H32O4          | 8.88      | 335.00             | [M-H]– | 59.10            | 0.061                   | 0.327                      |
| 9                                            | 5-OxoETE                  | C20H30O3          | 12.20     | 317.00             | [M-H]– | 203.25           | 0.104                   | 0.758                      |
| 10                                           | 15-OxoETE                 | C20H30O3          | 11.45     | 317.00             | [M-H]– | 139.20           | 0.062                   | 0.292                      |
| 11                                           | (±)5(6)-EET               | C20H32O3          | 11.44     | 319.00             | [M-H]– | 163.30           | 0.072                   | 0.153                      |
| 12                                           | (±)8(9)-EET               | C20H32O3          | 11.62     | 319.00             | [M-H]– | 301.25           | 0.135                   | 0.502                      |
| 13                                           | (±)11(12)-EET             | C20H32O3          | 11.63     | 319.00             | [M-H]– | 257.25           | 0.136                   | 0.264                      |
| 14                                           | (±)14(15)-EET             | C20H32O3          | 11.11     | 319.00             | [M-H]– | 219.20           | 0.040                   | 0.068                      |
| 15                                           | (±)11(12)-DiHET           | C20H34O4          | 9.96      | 337.00             | [M-H]– | 167.20           | 0.593                   | 0.438                      |
| 16                                           | (±)14(15)-DiHET           | C20H34O4          | 9.70      | 337.00             | [M-H]– | 207.20           | 0.055                   | 0.020                      |
| 17                                           | Leukotriene B4            | C20H32O4          | 9.23      | 335.00             | [M-H]– | 195.20           | 0.276                   | 0.665                      |
| 18                                           | Lipoxin B4                | C20H32O5          | 8.50      | 351.00             | [M-H]– | 211.25           | 0.957                   | 0.795                      |
| 19                                           | Thromboxane B2            | C20H34O6          | 6.34      | 369.00             | [M-H]– | 169.25           | 0.433                   | 0.914                      |
| 20                                           | 11-dehydro Thromboxane B2 | C20H32O6          | 8.04      | 367.00             | [M-H]– | 305.25           | 0.315                   | 0.343                      |
| 21                                           | Prostaglandin A2          | C20H30O4          | 8.67      | 333.00             | [M-H]– | 271.30           | 0.823                   | 0.854                      |
| 22                                           | Prostaglandin B2          | C20H30O4          | 8.42      | 333.00             | [M-H]– | 175.25           | 0.316                   | 0.066                      |
| 23                                           | Prostagrandin D2          | C20H32O5          | 7.27      | 351.00             | [M-H]– | 271.30           | 0.186                   | 0.180                      |
| 24                                           | Prostagrandin E2          | C20H32O5          | 7.49      | 351.00             | [M-H]– | 271.30           | 0.114                   | 0.231                      |
| 25                                           | 15-keto Prostaglandin E2  | C20H30O5          | 7.55      | 349.00             | [M-H]– | 287.25           | 0.249                   | 0.121                      |
| <i>Docosahexanoic acid derived oxylipins</i> |                           |                   |           |                    |        |                  |                         |                            |
| 26                                           | (±)4-HDHA                 | C22H32O3          | 11.75     | 343.00             | [M-H]– | 101.05           | 0.018                   | 0.042                      |
| 27                                           | (±)7-HDHA                 | C22H32O3          | 11.43     | 343.00             | [M-H]– | 141.15           | 0.004                   | 0.012                      |
| 28                                           | (±)8-HDHA                 | C22H32O3          | 11.51     | 343.00             | [M-H]– | 189.25           | 0.028                   | 0.074                      |
| 29                                           | (±)10-HDHA                | C22H32O3          | 11.27     | 343.00             | [M-H]– | 153.00           | 0.045                   | 0.075                      |
| 30                                           | (±)13-HDHA                | C22H32O3          | 11.17     | 343.00             | [M-H]– | 193.20           | 0.019                   | 0.051                      |
| 31                                           | 14-HDHA                   | C22H32O3          | 11.75     | 343.00             | [M-H]– | 281.00           | 0.062                   | 0.111                      |
| 32                                           | (±)16-HDHA                | C22H32O3          | 11.09     | 343.00             | [M-H]– | 233.25           | 0.038                   | 0.092                      |
| 33                                           | (±)17-HDHA                | C22H32O3          | 11.43     | 343.00             | [M-H]– | 201.25           | 0.023                   | 0.049                      |

|                                                |                  |          |       |        |           |        |       |       |
|------------------------------------------------|------------------|----------|-------|--------|-----------|--------|-------|-------|
| <i>Eicosapentaenoic acid derived oxylipins</i> |                  |          |       |        |           |        |       |       |
| 34                                             | 8-HEPE           | C20H30O3 | 10.67 | 317.20 | [M-H]–    | 255.00 | 0.572 | 0.306 |
| 35                                             | 11-HEPE          | C20H30O3 | 10.52 | 317.20 | [M-H]–    | 167.00 | 0.090 | 0.501 |
| 36                                             | (±)12-HEPE       | C20H30O3 | 10.68 | 317.20 | [M-H]–    | 179.20 | 0.442 | 0.456 |
| 37                                             | (±)15-HEPE       | C20H30O3 | 10.51 | 317.20 | [M-H]–    | 219.20 | 0.087 | 0.375 |
| 38                                             | (±)18-HEPE       | C20H30O3 | 10.26 | 317.20 | [M-H]–    | 255.25 | 0.108 | 0.678 |
| 39                                             | (±)11(12)-EpETE  | C20H30O3 | 12.22 | 317.20 | [M-H]–    | 255.30 | 0.080 | 0.165 |
| 40                                             | Prostaglandin D3 | C20H30O5 | 7.56  | 349.20 | [M-H]–    | 189.25 | 0.575 | 0.352 |
| 41                                             | Prostaglandin E3 | C20H30O5 | 5.70  | 349.20 | [M-H]–    | 269.25 | 0.683 | 0.458 |
| <i>Docosapentaenoic acid derived oxylipins</i> |                  |          |       |        |           |        |       |       |
| 42                                             | 17-HpDPA         | C22H34O4 | 8.50  | 361.20 | [M-H]–    | 221.10 | 0.293 | 0.898 |
| <i>Linoleic acid derived oxylipins</i>         |                  |          |       |        |           |        |       |       |
| 43                                             | 9-HODE           | C18H32O3 | 11.98 | 341.00 | [M+HCOO]– | 301.00 | 0.212 | 0.472 |
| 44                                             | 9-oxoODE         | C18H30O3 | 11.67 | 293.00 | [M-H]–    | 185.00 | 0.194 | 0.035 |
| 45                                             | 9(10)-EpOME      | C18H32O3 | 10.95 | 295.00 | [M-H]–    | 277.40 | 0.253 | 0.167 |
| 46                                             | 9,10-DiHOME      | C18H34O4 | 9.46  | 313.00 | [M-H]–    | 201.20 | 0.030 | 0.410 |
| 47                                             | 13-HODE          | C18H32O3 | 11.88 | 341.00 | [M+HCOO]– | 301.05 | 0.167 | 0.257 |
| 48                                             | 12,13-DiHOME     | C18H34O4 | 9.30  | 313.00 | [M-H]–    | 183.25 | 0.111 | 0.403 |
| <i>Alpha-linolenic acid derived oxylipins</i>  |                  |          |       |        |           |        |       |       |
| 49                                             | 9-HOTrE          | C18H30O3 | 10.16 | 293.00 | [M-H]–    | 275.00 | 0.198 | 0.477 |
| 50                                             | 9-HpOTrE         | C18H30O4 | 10.28 | 309.00 | [M-H]–    | 291.00 | 0.153 | 0.016 |
| 51                                             | 13-HOTrE         | C18H30O3 | 11.76 | 339.00 | [M+HCOO]– | 298.00 | 0.066 | 0.958 |

**Table S3.** Gene-specific primers for semi-quantitative RT-PCR analysis

| Gene                           |         | Primer Sequence ( 5' to 3' )    |
|--------------------------------|---------|---------------------------------|
| <i>Il-6</i>                    | Forward | AGT TGC CTT CTT GGG ACT GA      |
|                                | Reverse | TCC ACG ATT TCC CAG AGA AC      |
| <i>Il1<math>\beta</math></i>   | Forward | CTT CAG GCA GGC AGT ATC ACT C   |
|                                | Reverse | TTG TTG TTC ATC TCG GAG CC      |
| <i>Tnf-<math>\alpha</math></i> | Forward | AGC CCC CAG TGT GTA TCC TT      |
|                                | Reverse | ACA GTC CAG GTC ACT GTC CC      |
| <i>Fizz1</i>                   | Forward | CAA GGA ACT TCT TGC CAA TCC AG  |
|                                | Reverse | CCA AGA TCC ACA GGC AAA GCC A   |
| <i>Mmp13</i>                   | Forward | GAT GAC CTG TCT GAG GAA GAC C   |
|                                | Reverse | GCA TTT CTC GGA GCC TGT CAA C   |
| <i>Muc5ac</i>                  | Forward | CCA CTT TCT CCT TCT CCA CAC C   |
|                                | Reverse | GGT TGT CGA TGC AGC CTT GCT T   |
| <i>Ym1</i>                     | Forward | TCA CAG GTC TGG CAA TTC TTC TG  |
|                                | Reverse | TTT GTC CTT AGG AGG GCT TCC TCG |
| <i>Vegf</i>                    | Forward | CTG CTG TAA CGA TGA AGC CCT G   |
|                                | Reverse | GCT GTA GGA AGC TCA TCT CTC C   |
| <i>Cd206</i>                   | Forward | GTT CAC CTG GAG TGA TGG TTC TC  |
|                                | Reverse | AGG ACA TGC CAG GGT CAC CTT T   |
| <i>Cxcr4</i>                   | Forward | GAC TGG CAT AGT CGG CAA TGG A   |
|                                | Reverse | CAA AGA GGA GGT CAG CCA CTG A   |
| <i>Ccl24</i>                   | Forward | ATT CCA GAA AAC CGA GTG GTT AGC |
|                                | Reverse | GCA TCC AGT TTT TGT ATG TGC CTC |
| <i>Cxcl13</i>                  | Forward | CAT AGA TCG GAT TCA AGT TAC GCC |
|                                | Reverse | GTA ACC ATT TGG CAC GAG GAT TC  |
| <i>Cyp4f13</i>                 | Forward | CCC TAA ACC GAG CTG GTT CTG     |
|                                | Reverse | GAG TCG CAG GAT TGG GTA CAC     |
| <i>Cyp4f39</i>                 | Forward | CGA GCA CAT CAG CCT TAT GAC C   |
|                                | Reverse | TCC AGG TAG TGA TGC AAG CGG T   |
| <i>Alox12</i>                  | Forward | CTC TTG TCA TGC TGA GGA TGG AC  |
|                                | Reverse | AAG AGC CAG GCA AGT GGA GGA     |
